# Supplementary material
Source: ML conference proceedings conference paper supplement (https://proceedings.mlr.press/v84/rosenfeld18b.html)
Supplement: Supplementary file [file rosenfeld18b-supp.pdf]

---

# Discriminative Learning of Prediction Intervals: Supplementary Material

---

**Nir Rosenfeld**  
Harvard University  
and Microsoft Research

**Yishay Mansour**  
Tel Aviv University

**Elad Yom-Tov**  
Microsoft Research

## 1 Equivalence of Parameterization

There are two natural parameterizations of intervals. The first is to model the interval boundaries via:

$$\hat{\ell} = f_{\ell}(x; w_{\ell}), \quad \hat{u} = f_u(x; w_u)$$

The second is to model the interval center and size:

$$\hat{y} = f(x; w), \quad \hat{\Delta} = g(x; v)$$

Here we show that for linear predictors, both parameterizations are equivalent. Specifically, we show that for every  $(w_{\ell}, w_u)$  there exist some  $(\tilde{w}, \tilde{v})$  whose predictions coincide on all  $x$ , and vice versa.

Let  $w_{\ell}, w_u \in \mathbb{R}^d$ , and consider some  $x \in \mathcal{X}$ . Note that:

$$\begin{aligned} \hat{y} &= \frac{1}{2}(w_{\ell}^{\top} x + w_u^{\top} x) = \left(\frac{1}{2}(w_{\ell} + w_u)\right)^{\top} x = \tilde{w}^{\top} x \\ \hat{\Delta} &= w_u^{\top} x - w_{\ell}^{\top} x = (w_u - w_{\ell})^{\top} x = \tilde{v}^{\top} x \end{aligned}$$

Similarly, for  $w, v \in \mathbb{R}^d$ , we have:

$$\begin{aligned} \hat{\ell} &= w^{\top} x - \frac{1}{2}v^{\top} x = \left(w - \frac{1}{2}v\right)^{\top} x = \tilde{w}_{\ell}^{\top} x \\ \hat{u} &= w^{\top} x + \frac{1}{2}v^{\top} x = \left(w + \frac{1}{2}v\right)^{\top} x = \tilde{w}_u^{\top} x \end{aligned}$$

We note that the only practical difference here would be when each component is regularized separately (e.g., with a different regularization constant).

## 2 VC of Functions and Losses

Recall that for a loss function  $L$  and a function class  $\mathcal{F}$ , we define their composition as:

$$\mathcal{L}(\mathcal{F}) = \{L(y, f(x)) : f \in \mathcal{F}\} \quad (1)$$

we denote the by  $\mathcal{L}_{0/1}(\mathcal{H})$  the composition of the binary 0/1-loss function  $L_{0/1}(\cdot)$  with a binary function class  $\mathcal{H}$ , where:

$$L_{0/1}(y, \hat{y}) = \mathbf{1}_{\{y \neq \hat{y}\}} \quad (2)$$

Here we prove the following claim:

**Lemma 1.** *The VC dimension of  $\mathcal{H}$  equals the VC dimension of  $\mathcal{L}_{0/1}(\mathcal{H})$ .*

*Proof.* The important observation here is that while both  $\mathcal{H}$  and  $\mathcal{L}_{0/1}(\mathcal{H})$  include functions with binary outputs, the functions differ in their domain. Specifically, functions in  $\mathcal{H}$  map items  $x$  to binary outputs  $y \in \{0, 1\}$ , while functions in  $\mathcal{L}_{0/1}(\mathcal{H})$  take as input pairs  $(x, y)$  with  $y \in \{0, 1\}$  and, via some  $h \in \mathcal{H}$ , output the loss value  $z \in \{0, 1\}$ .

Assume the VC dimension of  $\mathcal{H}$  is  $m$ , then there exist some  $x_1, \dots, x_m$  which shatter  $\mathcal{H}$ . This means that for every  $y_1, \dots, y_m$ , there exists some  $h_y \in \mathcal{H}$  for which  $h_y(x_i) = y_i$  for every  $i$ . Consider the set of pairs  $(x_1, 0), \dots, (x_m, 0)$ . For any  $z_1, \dots, z_m$ , we have some  $h_z \in \mathcal{H}$  for which  $h_z(x_i) = z_i$  for every  $i$ . This means that any  $z_i = 0$  gives  $h_z(x_i) = 0$ , and hence:

$$L_{0/1}(0, h_z(x_i)) = 0 = z_i$$

Similarly, for any  $z_i = 1$  we have  $h_z(x_i) = 1$  and:

$$L_{0/1}(0, h_z(x_i)) = 1 = z_i$$

Now, assume the VC dimension of  $\mathcal{L}_{0/1}(\mathcal{H})$  is  $m$ . Then there exist some  $(x_1, y_1), \dots, (x_m, y_m)$  which shatter  $\mathcal{L}_{0/1}(\mathcal{H})$ . This means that for every  $z_1, \dots, z_m$ , there exists some  $h_z \in \mathcal{H}$  such that  $L_{0/1}(y_i, h_z(x_i)) = z_i$ . Consider the set  $x_1, \dots, x_m$ . For any  $y_1, \dots, y_m$ , set  $z_i = 0$  for all  $i$ . Hence, the corresponding  $h_z$  is such that  $L_{0/1}(y_i, h_z(x_i)) = 0$  for all  $i$ , which means that  $h(x_i) = y_i$  as needed.  $\square$
